# Supplementary material for: Self-assembly of highly conductive self-n-doped fullerene ammonium halides and their application in thein situsolution-processable fabrication of working electrodes for alcohol electrooxidation
Source: Royal Society of Chemistry journal article supplement (doi:10.1039/c8ra00100f), 2018-01-01
Supplement: c8ra00100f1.pdf [file c8ra00100f1.pdf]

## Supporting Information

### Self-assembly of highly conductive self-*n*-doped fullerene ammonium halides and their application in the in situ solution-processable fabrication of working electrodes for alcohol electrooxidation

Huanhuan Wang<sup>†</sup>, Xuan Sun<sup>†</sup>, Zhouchen Lin, Zhenfeng Pang, Xueqian Kong, Ming Lei\* and Yongfang Li

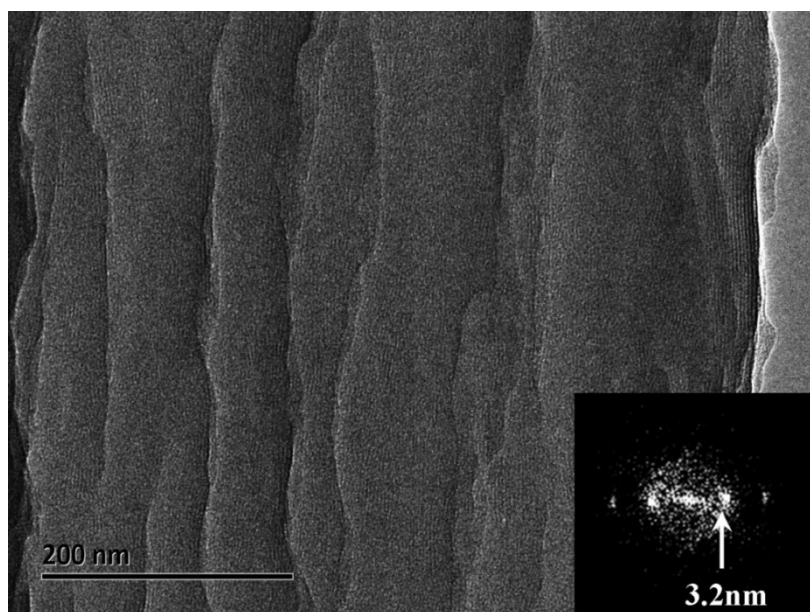

**Figure S1.** Cross-sectional high resolution TEM image of large area self-assembled PCBDANI film.
